# Supplementary material for: Molecular Typing and Antimicrobial Susceptibility Profile of <em>Staphylococcus aureus</em> Isolates Recovered from Bovine Mastitis and Nasal Samples
Source: Preprints.org preprint supplement (doi:10.20944/preprints202009.0115.v1), 2020-09-05
Supplement: Supplementary file 1 [file supplementary]

- 1 Table S1. Antimicrobial susceptibility profile of the *Staphylococcus aureus* isolates from milk and nasal/muzzles swabs samples performed by the  
2 automated Vitek 2<sup>®</sup> compact system by minimum inhibitory concentration.

[illegible]

[illegible]

[illegible]

|                                                                                         |      |                  |                   |                        |   |   |                               |                                   |                                   |                              |          |   |                                   |   |                              |          |          |   |   |   |   |   |          |
|-----------------------------------------------------------------------------------------|------|------------------|-------------------|------------------------|---|---|-------------------------------|-----------------------------------|-----------------------------------|------------------------------|----------|---|-----------------------------------|---|------------------------------|----------|----------|---|---|---|---|---|----------|
| Tetracycline <sup>1</sup><br><br>(1.0 – 16 µg mL <sup>-1</sup> )                        | ≥ 16 | Milk<br><br>Swab | 43.96<br><br>0    | 43.9<br><br>6<br><br>0 | – | – | –                             | –                                 | 94<br>(51.64)<br><br>6<br>(85.71) | 6 (3.30)<br><br>1<br>(14.29) | 1 (0.55) | – | 1 (0.55)                          | – | 80<br>(43.96)                | –        | –        | – | – | – | – | – | –        |
| Trimethoprim/<br>sulfamethaxazole <sup>2</sup><br><br>(10.0 – 320 µg mL <sup>-1</sup> ) | ≥ 80 | Milk<br><br>Swab | 0.55<br><br>0     | 0.55<br><br>0          | – | – | –                             | –                                 | –                                 | –                            | –        | – | 178<br>97.80)<br><br>1<br>(85.71) | – | 3 (1.65)<br><br>1<br>(14.29) | –        | –        | – | – | – | – | – | 1 (0.55) |
| Vancomycin <sup>1</sup><br><br>(0.5 – 32 µg mL <sup>-1</sup> )                          | ≥ 16 | Milk<br><br>Swab | 3.30<br><br>0     | 3.30<br><br>0          | – | – | –                             | 88<br>(48.35)<br><br>5<br>(71.43) | 78<br>(42.86)<br><br>2<br>(28.57) | 10<br>(5.49)                 | –        | – | –                                 | – | –                            | 6 (3.30) | –        | – | – | – | – | – | –        |
| Oxacillin <sup>1</sup><br><br>(0.25 – 4.0 µg mL <sup>-1</sup> )                         | ≥ 4  | Milk<br><br>Swab | 4.40<br><br>0     | 4.40<br><br>0          | – | – | 162<br>(89.01)<br><br>7 (100) | 11<br>(6.04)                      | –                                 | 1 (0.55)                     | 8 (4.40) | – | –                                 | – | –                            | –        | –        | – | – | – | – | – | –        |
| Cefoxitin<br>screening                                                                  | ≥ 8  | Milk<br><br>Swab | 2.20<br><br>14.29 | 2.20<br><br>14.29      | – | – | –                             | –                                 | –                                 | –                            | –        | – | –                                 | – | –                            | –        | –        | – | – | – | – | – | –        |
| Fusidic acid <sup>2</sup><br><br>(0.5 – 32 µg mL <sup>-1</sup> )                        | ≥ 1  | Milk<br><br>Swab | 3.85<br><br>0     | 3.85<br><br>0          | – | – | –                             | 173<br>(95.05)<br><br>7 (100)     | 2 (1.10)                          | –                            | 1 (0.55) | – | 1 (0.55)                          | – | 1 (0.55)                     | –        | 4 (2.20) | – | 1 | – | – | – | –        |

3 MIC: minimal inhibitory concentration. BP: MIC breakpoint, which is defined as the lowest concentration of an antimicrobial necessary to inhibit visible growth. <sup>1</sup>MIC breakpoints established by the Clinical & Laboratory  
4 Standards Institute (CLSI) guidelines (CLSI, 2018a and 2018b). <sup>2</sup>MIC breakpoints established by the European Committee on Antimicrobial Susceptibility Testing (EUCAST, 2019). Values in bold indicate intermediate  
5 resistance to that antimicrobial. Values in bold and red indicate resistance to that antimicrobial. Swab: nasal swab. NA: not available. Dashes indicate values not tested for the indicated antimicrobial.
